# Supplementary material
Source: Copernicus journal article supplement (doi:10.5194/bg-23-2847-2026)
Supplement: Supplementary file 1 [file bg-23-2847-2026-supplement.pdf]

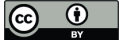

*Supplement of*

## **Environmental and habitat controls on non-marine ostracod distribution in Greenlandic Arctic lakes**

**Lucy R. Roberts et al.**

*Correspondence to:* Lucy R. Roberts ([lucy.roberts@ucl.ac.uk](mailto:lucy.roberts@ucl.ac.uk))

The copyright of individual parts of the supplement might differ from the article licence.

**Table S1.** Water composition and chemistry recorded in 24 study lakes, including variables removed due to statistically significant correlations

| Lake ID | Electrical conductivity (mS cm <sup>-1</sup> ) | Water temperature (°C) | SRP (µgL <sup>-1</sup> ) | NO <sub>3</sub> -N (µgL <sup>-1</sup> ) | NO <sub>2</sub> -N (µgL <sup>-1</sup> ) | NH <sub>4</sub> -N (µgL <sup>-1</sup> ) | Silicate (mgL <sup>-1</sup> ) | Chlorophyll-a (µgL <sup>-1</sup> ) | Total alkalinity (meqL <sup>-1</sup> ) | pH  | % sat DO | Secchi depth (m) |
|---------|------------------------------------------------|------------------------|--------------------------|-----------------------------------------|-----------------------------------------|-----------------------------------------|-------------------------------|------------------------------------|----------------------------------------|-----|----------|------------------|
| 1       | 0.4                                            | 10.5                   | 5.73                     | BDL                                     | 0.49                                    | 0                                       | 0.4                           | 0.31                               | 3                                      | 8.5 | 99       | 5.15             |
| 2       | 0.16                                           | 10.5                   | 3.34                     | BDL                                     | 0.49                                    | 0                                       | 0.38                          | 1.01                               | 1.2                                    | 8.6 | 100      | 11.8             |
| 3       | 0.87                                           | 10.4                   | 49.66                    | 7.75                                    | 1.97                                    | 43.6                                    | 8.36                          | 1.27                               | 4.15                                   | 8.1 | 86       | 1.4              |
| 4       | 1.19                                           | 10.4                   | 24.59                    | 3.88                                    | 1.97                                    | 0.87                                    | 4.53                          | 1.27                               | 5.15                                   | 8.6 | 101      | 1.7              |
| 5       | 0.68                                           | 10.3                   | 0.95                     | 2.58                                    | 0.49                                    | 7.85                                    | 0.41                          | 0.22                               | 4.6                                    | 8.6 | 108      | 8.1              |
| 6       | 3.00                                           | 10.3                   | 4.26                     | 2.58                                    | 0.99                                    | 5.23                                    | 0.62                          | 0.34                               | 15.6                                   | 8.4 | 108      | 5.8              |
| 7       | 4.09                                           | 10.2                   | 14.19                    | BDL                                     | 1.97                                    | 14.83                                   | 1.08                          | 0.09                               | 20.9                                   | 9.1 | 103      | 6.6              |
| 8       | 0.99                                           | 10.2                   | 0.93                     | 3.82                                    | 0                                       | 2.28                                    | 0.18                          | 0.29                               | 5.05                                   | 9.2 | 99       | 4.9              |
| 9       | 0.32                                           | 10.1                   | 1.87                     | 1.27                                    | 0                                       | 0                                       | 0.47                          | 0.38                               | 2.45                                   | 8.8 | 107      | 5.2              |
| 10      | 0.71                                           | 10.1                   | 2.8                      | 1.27                                    | 0                                       | 0                                       | 0.91                          | 0.77                               | 5.2                                    | 8.2 | 109      | 2.3              |
| 11      | 0.15                                           | 10.0                   | 0.93                     | 2.55                                    | 0                                       | 0                                       | 0.32                          | 0.37                               | 1.1                                    | 9.3 | 101      | 1.5              |
| 12      | 0.07                                           | 10.0                   | 14.43                    | 12.27                                   | 0.5                                     | 0                                       | 1.76                          | 0.37                               | 0.55                                   | 8.8 | 96       | 0.7              |
| 13      | 0.17                                           | 9.9                    | 6.77                     | 3.51                                    | 0                                       | 0                                       | 0.55                          | 2.65                               | 1.15                                   | 7.7 | 106      | 2.8              |
| 14      | 0.19                                           | 9.8                    | 3.16                     | BDL                                     | 0                                       | 0                                       | 0.4                           | 0.18                               | 1.7                                    | 8.2 | 103      | 10.7             |
| 15      | 0.01                                           | 9.8                    | 4.96                     | 1.75                                    | 0                                       | 0                                       | 0.55                          | 0.34                               | 0.2                                    | 8.3 | 109      | 0.13             |
| 16      | 0.11                                           | 9.8                    | 0.9                      | BDL                                     | 0                                       | 0                                       | 0.19                          | 0.11                               | 1.05                                   | 8.2 | 115      | 13.2             |
| 17      | 0.7                                            | 9.7                    | 3.61                     | 1.75                                    | 0.5                                     | 0                                       | 0.65                          | 0.51                               | 5.4                                    | 8   | 117      | 3.9              |
| 18      | 0.47                                           | 9.7                    | 6.31                     | 1.75                                    | 0                                       | 0                                       | 0.6                           | 0.24                               | 4.25                                   | 9.3 | 109      | 2.4              |
| 19      | 0.54                                           | 9.6                    | 2.71                     | 3.51                                    | 0                                       | 1.84                                    | 0.6                           | 0.75                               | 4.75                                   | 9.7 | 98       | 3.3              |
| 20      | 0.07                                           | 9.6                    | 1.96                     | 2.59                                    | 0.99                                    | 1.7                                     | 0.32                          | 0.21                               | 0.5                                    | 8.1 | 97       | 8.5              |
| 21      | 0.1                                            | 9.6                    | 2.45                     | 2.59                                    | 1.98                                    | 0                                       | 0.64                          | 0.23                               | 0.8                                    | 8.0 | 105      | 8.55             |
| 22      | 0.09                                           | 9.5                    | 2.45                     | 2.59                                    | 1.49                                    | 0                                       | 0.14                          | 0.59                               | 0.8                                    | 8.4 | 114      | 3.3              |
| 23      | 0.51                                           | 9.5                    | 2.43                     | 4.24                                    | 1.49                                    | 2.56                                    | 0.86                          | 2.36                               | 3.7                                    | 8.9 | 114      | 1.55             |
| 24      | 0.16                                           | 9.5                    | 1.94                     | 2.12                                    | 1.98                                    | 1.81                                    | 1.22                          | 0.89                               | 1.1                                    | 8.8 | 105      | 3.4              |

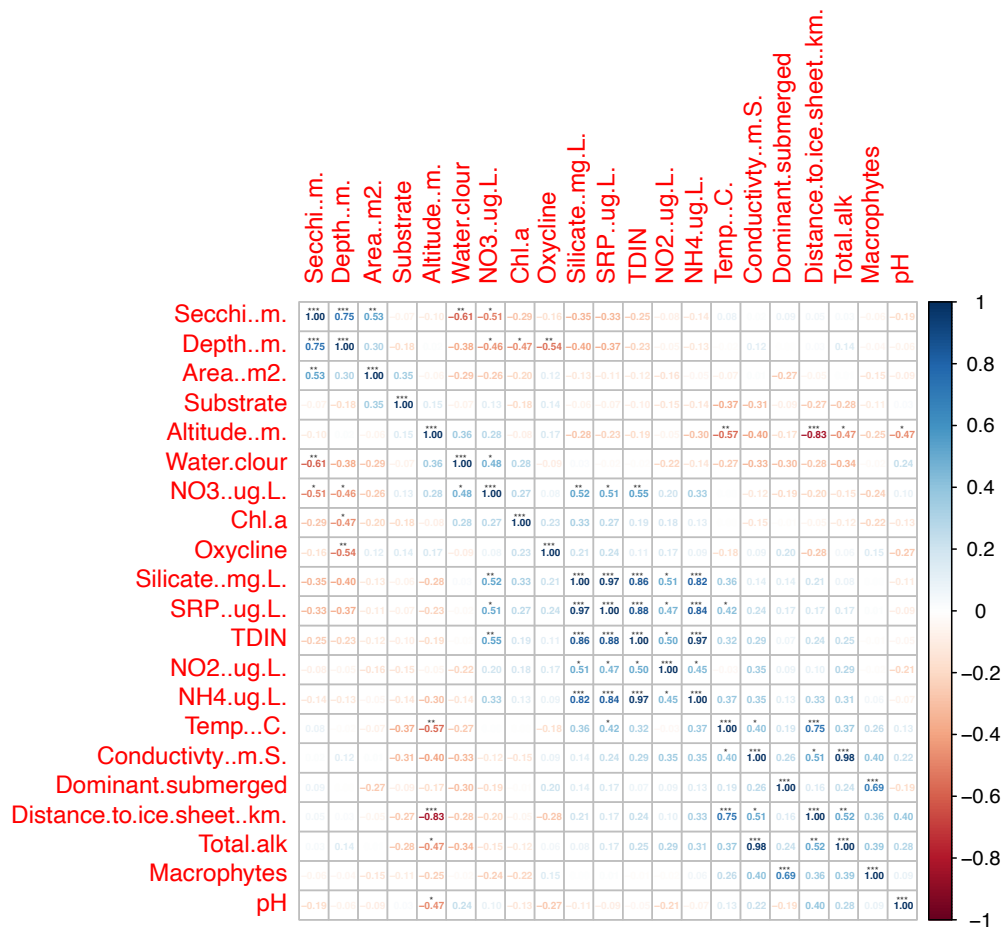

Figure S1. Correlation matrix of environmental variables

**Table S2.** Ostracod count data with information on numbers of carapaces and carapaces with soft parts.

| Lake ID | <i>C. candida</i> valves | <i>C. candida</i> carapaces | <i>C. candida</i> soft parts | <i>C. candida</i> total | <i>C. candida</i> per gram | <i>Candona juv</i> valves | <i>Candona juv</i> carapaces | <i>Candona juv</i> soft parts | <i>Candona juv</i> total | <i>Candona juv</i> per gram |
|---------|--------------------------|-----------------------------|------------------------------|-------------------------|----------------------------|---------------------------|------------------------------|-------------------------------|--------------------------|-----------------------------|
| 1       | 0                        | 0                           | 0                            | 0                       | 0.00                       | 0                         | 0                            | 0                             | 0                        | 0.00                        |
| 2       | 9                        | 4                           | 2                            | 13                      | 2.85                       | 2                         | 0                            | 0                             | 2                        | 0.44                        |
| 3       | 1                        | 0                           | 0                            | 1                       | 1.00                       | 0                         | 0                            | 0                             | 0                        | 0.00                        |
| 4       | 0                        | 0                           | 0                            | 0                       | 0.00                       | 0                         | 0                            | 0                             | 0                        | 0.00                        |
| 5       | 88                       | 21                          | 7                            | 108                     | 7.88                       | 10                        | 0                            | 0                             | 10                       | 0.73                        |
| 6       | 9                        | 0                           | 0                            | 9                       | 2.95                       | 0                         | 0                            | 0                             | 0                        | 0.00                        |
| 7       | 52                       | 2                           | 0                            | 54                      | 8.22                       | 0                         | 0                            | 0                             | 0                        | 0.00                        |
| 8       | 54                       | 7                           | 0                            | 61                      | 45.29                      | 16                        | 0                            | 0                             | 16                       | 11.88                       |
| 9       | 2                        | 0                           | 0                            | 2                       | 4.33                       | 2                         | 0                            | 0                             | 2                        | 4.33                        |
| 10      | 6                        | 4                           | 1                            | 10                      | 5.15                       | 1                         | 0                            | 0                             | 1                        | 0.52                        |
| 11      | 4                        | 13                          | 12                           | 17                      | 15.10                      | 0                         | 1                            | 1                             | 1                        | 0.89                        |
| 12      | 1                        | 20                          | 15                           | 21                      | 3.06                       | 1                         | 5                            | 0                             | 6                        | 0.88                        |
| 13      | 2                        | 12                          | 12                           | 14                      | 2.04                       | 1                         | 13                           | 10                            | 14                       | 2.04                        |
| 14      | 2                        | 0                           | 0                            | 2                       | 0.23                       | 0                         | 0                            | 0                             | 0                        | 0.00                        |
| 15      | 0                        | 2                           | 1                            | 2                       | 0.18                       | 0                         | 3                            | 3                             | 3                        | 0.28                        |
| 16      | 0                        | 0                           | 0                            | 0                       | 0.00                       | 0                         | 0                            | 0                             | 0                        | 0.00                        |
| 17      | 6                        | 6                           | 4                            | 12                      | 20.48                      | 0                         | 0                            | 0                             | 0                        | 0.00                        |
| 18      | 31                       | 13                          | 9                            | 44                      | 1.64                       | 0                         | 0                            | 0                             | 0                        | 0.00                        |
| 19      | 11                       | 1                           | 1                            | 12                      | 11.72                      | 0                         | 0                            | 0                             | 0                        | 0.00                        |
| 20      | 1                        | 4                           | 4                            | 5                       | 2.01                       | 0                         | 0                            | 0                             | 0                        | 0.00                        |
| 21      | 0                        | 0                           | 0                            | 0                       | 0.00                       | 0                         | 0                            | 0                             | 0                        | 0.00                        |
| 22      | 1                        | 5                           | 0                            | 6                       | 1.36                       | 0                         | 0                            | 0                             | 0                        | 0.00                        |
| 23      | 27                       | 58                          | 19                           | 85                      | 35.45                      | 0                         | 0                            | 0                             | 0                        | 0.00                        |
| 24      | 3                        | 0                           | 0                            | 3                       | 4.86                       | 0                         | 0                            | 0                             | 0                        | 0.00                        |

Table S2 continued.

| Lake ID | <i>Heterocypris incongruens</i><br>valves | <i>Heterocypris incongruens</i><br>carapaces | <i>Heterocypris incongruens</i><br>soft parts | <i>Heterocypris incongruens</i><br>total | <i>Heterocypris incongruens</i><br>per gram | <i>Arctocypris</i> sp.<br>valves | <i>Arctocypris</i> sp.<br>carapaces | <i>Arctocypris</i> sp.<br>soft parts | <i>Arctocypris</i> sp.<br>total | <i>Arctocypris</i> sp.<br>per gram |
|---------|-------------------------------------------|----------------------------------------------|-----------------------------------------------|------------------------------------------|---------------------------------------------|----------------------------------|-------------------------------------|--------------------------------------|---------------------------------|------------------------------------|
| 1       | 0                                         | 0                                            | 0                                             | 0                                        | 0.00                                        | 0                                | 0                                   | 0                                    | 0                               | 0.00                               |
| 2       | 0                                         | 0                                            | 0                                             | 0                                        | 0.00                                        | 0                                | 0                                   | 0                                    | 0                               | 0.00                               |
| 3       | 4                                         | 1                                            | 0                                             | 5                                        | 5.00                                        | 0                                | 0                                   | 0                                    | 0                               | 0.00                               |
| 4       | 0                                         | 0                                            | 0                                             | 0                                        | 0.00                                        | 0                                | 0                                   | 0                                    | 0                               | 0.00                               |
| 5       | 0                                         | 0                                            | 0                                             | 0                                        | 0.00                                        | 3                                | 0                                   | 1                                    | 3                               | 0.22                               |
| 6       | 15                                        | 5                                            | 1                                             | 20                                       | 6.55                                        | 45                               | 1                                   | 0                                    | 46                              | 15.07                              |
| 7       | 0                                         | 0                                            | 0                                             | 0                                        | 0.00                                        | 23                               | 3                                   | 0                                    | 26                              | 3.96                               |
| 8       | 0                                         | 0                                            | 0                                             | 0                                        | 0.00                                        | 0                                | 0                                   | 0                                    | 0                               | 0.00                               |
| 9       | 1                                         | 0                                            | 0                                             | 1                                        | 2.17                                        | 0                                | 0                                   | 0                                    | 0                               | 0.00                               |
| 10      | 1                                         | 2                                            | 0                                             | 3                                        | 1.55                                        | 0                                | 0                                   | 0                                    | 0                               | 0.00                               |
| 11      | 0                                         | 0                                            | 0                                             | 0                                        | 0.00                                        | 0                                | 0                                   | 0                                    | 0                               | 0.00                               |
| 12      | 0                                         | 0                                            | 0                                             | 0                                        | 0.00                                        | 0                                | 0                                   | 0                                    | 0                               | 0.00                               |
| 13      | 0                                         | 0                                            | 0                                             | 0                                        | 0.00                                        | 0                                | 0                                   | 0                                    | 0                               | 0.00                               |
| 14      | 0                                         | 0                                            | 0                                             | 0                                        | 0.00                                        | 0                                | 0                                   | 0                                    | 0                               | 0.00                               |
| 15      | 0                                         | 0                                            | 0                                             | 0                                        | 0.00                                        | 1                                | 0                                   | 0                                    | 1                               | 0.09                               |
| 16      | 0                                         | 0                                            | 0                                             | 0                                        | 0.00                                        | 0                                | 0                                   | 0                                    | 0                               | 0.00                               |
| 17      | 6                                         | 3                                            | 4                                             | 9                                        | 15.36                                       | 3                                | 1                                   | 2                                    | 4                               | 6.83                               |
| 18      | 2                                         | 2                                            | 2                                             | 4                                        | 0.15                                        | 1                                | 2                                   | 2                                    | 3                               | 0.11                               |
| 19      | 0                                         | 0                                            | 0                                             | 0                                        | 0.00                                        | 3                                | 0                                   | 0                                    | 3                               | 2.93                               |
| 20      | 0                                         | 0                                            | 0                                             | 0                                        | 0.00                                        | 0                                | 0                                   | 0                                    | 0                               | 0.00                               |
| 21      | 0                                         | 1                                            | 0                                             | 1                                        | 0.04                                        | 0                                | 0                                   | 0                                    | 0                               | 0.00                               |
| 22      | 0                                         | 0                                            | 0                                             | 0                                        | 0.00                                        | 0                                | 0                                   | 0                                    | 0                               | 0.00                               |
| 23      | 0                                         | 0                                            | 0                                             | 0                                        | 0.00                                        | 0                                | 0                                   | 0                                    | 0                               | 0.00                               |
| 24      | 0                                         | 0                                            | 0                                             | 0                                        | 0.00                                        | 0                                | 0                                   | 0                                    | 0                               | 0.00                               |

Table S2 continued

| Lake ID | <i>P. parva</i><br>valves | <i>P. parva</i><br>carapaces | <i>P. parva</i><br>soft parts | <i>P. parva</i><br>total | <i>P. parva</i><br>per gram | <i>L.</i><br><i>inopinata</i><br>valves | <i>L.</i><br><i>inopinata</i><br>carapaces | <i>L.</i><br><i>inopinata</i><br>soft parts | <i>L.</i><br><i>inopinata</i><br>total | <i>L.</i><br><i>inopinata</i><br>per gram |
|---------|---------------------------|------------------------------|-------------------------------|--------------------------|-----------------------------|-----------------------------------------|--------------------------------------------|---------------------------------------------|----------------------------------------|-------------------------------------------|
| 1       | 0.00                      | 0                            | 0                             | 0                        | 0.00                        | 0                                       | 0                                          | 0                                           | 0                                      | 0.00                                      |
| 2       | 0.00                      | 0                            | 0                             | 0                        | 0.00                        | 0                                       | 0                                          | 0                                           | 0                                      | 0.00                                      |
| 3       | 0.00                      | 0                            | 0                             | 0                        | 0.00                        | 0                                       | 0                                          | 0                                           | 0                                      | 0.00                                      |
| 4       | 0.00                      | 0                            | 0                             | 0                        | 0.00                        | 0                                       | 0                                          | 0                                           | 0                                      | 0.00                                      |
| 5       | 0.00                      | 0                            | 0                             | 0                        | 0.00                        | 0                                       | 3                                          | 0                                           | 3                                      | 0.22                                      |
| 6       | 4.00                      | 0                            | 0                             | 4                        | 1.31                        | 0                                       | 1                                          | 0                                           | 1                                      | 0.33                                      |
| 7       | 0.00                      | 0                            | 0                             | 0                        | 0.00                        | 4                                       | 0                                          | 0                                           | 4                                      | 0.61                                      |
| 8       | 0.00                      | 0                            | 0                             | 0                        | 0.00                        | 1                                       | 14                                         | 0                                           | 15                                     | 11.14                                     |
| 9       | 0.00                      | 0                            | 0                             | 0                        | 0.00                        | 0                                       | 0                                          | 0                                           | 0                                      | 0.00                                      |
| 10      | 0.00                      | 0                            | 0                             | 0                        | 0.00                        | 0                                       | 0                                          | 0                                           | 0                                      | 0.00                                      |
| 11      | 0.00                      | 0                            | 0                             | 0                        | 0.00                        | 0                                       | 0                                          | 0                                           | 0                                      | 0.00                                      |
| 12      | 0.00                      | 0                            | 0                             | 0                        | 0.00                        | 0                                       | 0                                          | 0                                           | 0                                      | 0.00                                      |
| 13      | 0.00                      | 0                            | 0                             | 0                        | 0.00                        | 0                                       | 0                                          | 0                                           | 0                                      | 0.00                                      |
| 14      | 0.00                      | 0                            | 0                             | 0                        | 0.00                        | 0                                       | 0                                          | 0                                           | 0                                      | 0.00                                      |
| 15      | 0.00                      | 0                            | 0                             | 0                        | 0.00                        | 0                                       | 0                                          | 0                                           | 0                                      | 0.00                                      |
| 16      | 0.00                      | 0                            | 0                             | 0                        | 0.00                        | 0                                       | 0                                          | 0                                           | 0                                      | 0.00                                      |
| 17      | 0.00                      | 0                            | 0                             | 0                        | 0.00                        | 0                                       | 0                                          | 0                                           | 0                                      | 0.00                                      |
| 18      | 0.00                      | 0                            | 0                             | 0                        | 0.00                        | 0                                       | 0                                          | 0                                           | 0                                      | 0.00                                      |
| 19      | 0.00                      | 0                            | 0                             | 0                        | 0.00                        | 0                                       | 0                                          | 0                                           | 0                                      | 0.00                                      |
| 20      | 0.00                      | 0                            | 0                             | 0                        | 0.00                        | 0                                       | 0                                          | 0                                           | 0                                      | 0.00                                      |
| 21      | 0.00                      | 0                            | 0                             | 0                        | 0.00                        | 0                                       | 0                                          | 0                                           | 0                                      | 0.00                                      |
| 22      | 0.00                      | 1                            | 0                             | 1                        | 0.23                        | 0                                       | 0                                          | 0                                           | 0                                      | 0.00                                      |
| 23      | 0.00                      | 0                            | 0                             | 0                        | 0.00                        | 0                                       | 0                                          | 0                                           | 0                                      | 0.00                                      |
| 24      | 0.00                      | 0                            | 0                             | 0                        | 0.00                        | 0                                       | 0                                          | 0                                           | 0                                      | 0.00                                      |

Table S2 continued.

| Lake ID | <i>L. sanctipatricii</i><br>valves | <i>L. sanctipatricii</i><br>carapaces | <i>L. sanctipatricii</i><br>soft parts | <i>L. sanctipatricii</i><br>total | <i>L. sanctipatricii</i><br>per gram | <i>I. bradyi</i><br>valves | <i>I. bradyi</i><br>carapaces | <i>I. bradyi</i><br>soft parts | <i>I. bradyi</i><br>total | <i>I. bradyi</i><br>per gram |
|---------|------------------------------------|---------------------------------------|----------------------------------------|-----------------------------------|--------------------------------------|----------------------------|-------------------------------|--------------------------------|---------------------------|------------------------------|
| 1       | 0                                  | 0                                     | 0                                      | 0                                 | 0.00                                 | 0                          | 0                             | 0                              | 0                         | 0.00                         |
| 2       | 0                                  | 0                                     | 0                                      | 0                                 | 0.00                                 | 0                          | 0                             | 0                              | 0                         | 0.00                         |
| 3       | 0                                  | 0                                     | 0                                      | 0                                 | 0.00                                 | 0                          | 0                             | 0                              | 0                         | 0.00                         |
| 4       | 0                                  | 0                                     | 0                                      | 0                                 | 0.00                                 | 0                          | 0                             | 0                              | 0                         | 0.00                         |
| 5       | 0                                  | 1                                     | 0                                      | 1                                 | 0.07                                 | 0                          | 0                             | 0                              | 0                         | 0.00                         |
| 6       | 0                                  | 0                                     | 0                                      | 0                                 | 0.00                                 | 4                          | 0                             | 0                              | 4                         | 1.31                         |
| 7       | 0                                  | 1                                     | 0                                      | 1                                 | 0.15                                 | 0                          | 0                             | 0                              | 0                         | 0.00                         |
| 8       | 0                                  | 0                                     | 0                                      | 0                                 | 0.00                                 | 0                          | 0                             | 0                              | 0                         | 0.00                         |
| 9       | 2                                  | 5                                     | 1                                      | 7                                 | 15.16                                | 0                          | 0                             | 0                              | 0                         | 0.00                         |
| 10      | 0                                  | 0                                     | 0                                      | 0                                 | 0.00                                 | 0                          | 0                             | 0                              | 0                         | 0.00                         |
| 11      | 0                                  | 0                                     | 0                                      | 0                                 | 0.00                                 | 0                          | 0                             | 0                              | 0                         | 0.00                         |
| 12      | 0                                  | 0                                     | 0                                      | 0                                 | 0.00                                 | 0                          | 0                             | 0                              | 0                         | 0.00                         |
| 13      | 0                                  | 0                                     | 0                                      | 0                                 | 0.00                                 | 0                          | 0                             | 0                              | 0                         | 0.00                         |
| 14      | 0                                  | 0                                     | 0                                      | 0                                 | 0.00                                 | 0                          | 0                             | 0                              | 0                         | 0.00                         |
| 15      | 0                                  | 0                                     | 0                                      | 0                                 | 0.00                                 | 0                          | 0                             | 0                              | 0                         | 0.00                         |
| 16      | 0                                  | 0                                     | 0                                      | 0                                 | 0.00                                 | 0                          | 0                             | 0                              | 0                         | 0.00                         |
| 17      | 0                                  | 0                                     | 0                                      | 0                                 | 0.00                                 | 0                          | 0                             | 0                              | 0                         | 0.00                         |
| 18      | 0                                  | 0                                     | 0                                      | 0                                 | 0.00                                 | 0                          | 0                             | 0                              | 0                         | 0.00                         |
| 19      | 2                                  | 6                                     | 0                                      | 8                                 | 7.81                                 | 2                          | 0                             | 0                              | 2                         | 1.95                         |
| 20      | 0                                  | 0                                     | 0                                      | 0                                 | 0.00                                 | 0                          | 0                             | 0                              | 0                         | 0.00                         |
| 21      | 0                                  | 1                                     | 0                                      | 1                                 | 0.04                                 | 0                          | 0                             | 0                              | 0                         | 0.00                         |
| 22      | 0                                  | 0                                     | 0                                      | 0                                 | 0.00                                 | 0                          | 0                             | 0                              | 0                         | 0.00                         |
| 23      | 0                                  | 0                                     | 0                                      | 0                                 | 0.00                                 | 0                          | 0                             | 0                              | 0                         | 0.00                         |
| 24      | 0                                  | 0                                     | 0                                      | 0                                 | 0.00                                 | 0                          | 0                             | 0                              | 0                         | 0.00                         |

Table S2 continued.

| Lake ID | <i>I. gibba</i> valves | <i>I. gibba</i> carapaces | <i>I. gibba</i> soft parts | <i>I. gibba</i> total | <i>I. gibba</i> per gram | <i>L. friabilis</i> valves | <i>L. friabilis</i> carapaces | <i>L. friabilis</i> soft parts | <i>L. friabilis</i> total | <i>L. friabilis</i> per gram |
|---------|------------------------|---------------------------|----------------------------|-----------------------|--------------------------|----------------------------|-------------------------------|--------------------------------|---------------------------|------------------------------|
| 1       | 0                      | 0                         | 0                          | 0                     | 0.00                     | 0                          | 0                             | 0                              | 0                         | 0.00                         |
| 2       | 0                      | 0                         | 0                          | 0                     | 0.00                     | 0                          | 0                             | 0                              | 0                         | 0.00                         |
| 3       | 0                      | 0                         | 0                          | 0                     | 0.00                     | 0                          | 0                             | 0                              | 0                         | 0.00                         |
| 4       | 0                      | 0                         | 0                          | 0                     | 0.00                     | 0                          | 0                             | 0                              | 0                         | 0.00                         |
| 5       | 0                      | 0                         | 0                          | 0                     | 0.00                     | 0                          | 0                             | 0                              | 0                         | 0.00                         |
| 6       | 0                      | 1                         | 0                          | 1                     | 0.33                     | 0                          | 0                             | 0                              | 0                         | 0.00                         |
| 7       | 0                      | 0                         | 0                          | 0                     | 0.00                     | 3                          | 0                             | 0                              | 3                         | 0.46                         |
| 8       | 0                      | 0                         | 0                          | 0                     | 0.00                     | 0                          | 0                             | 0                              | 0                         | 0.00                         |
| 9       | 0                      | 0                         | 0                          | 0                     | 0.00                     | 0                          | 0                             | 0                              | 0                         | 0.00                         |
| 10      | 0                      | 0                         | 0                          | 0                     | 0.00                     | 0                          | 0                             | 0                              | 0                         | 0.00                         |
| 11      | 0                      | 0                         | 0                          | 0                     | 0.00                     | 0                          | 0                             | 0                              | 0                         | 0.00                         |
| 12      | 0                      | 0                         | 0                          | 0                     | 0.00                     | 0                          | 0                             | 0                              | 0                         | 0.00                         |
| 13      | 0                      | 0                         | 0                          | 0                     | 0.00                     | 0                          | 0                             | 0                              | 0                         | 0.00                         |
| 14      | 0                      | 0                         | 0                          | 0                     | 0.00                     | 0                          | 0                             | 0                              | 0                         | 0.00                         |
| 15      | 0                      | 0                         | 0                          | 0                     | 0.00                     | 0                          | 0                             | 0                              | 0                         | 0.00                         |
| 16      | 0                      | 0                         | 0                          | 0                     | 0.00                     | 0                          | 0                             | 0                              | 0                         | 0.00                         |
| 17      | 0                      | 0                         | 0                          | 0                     | 0.00                     | 0                          | 0                             | 0                              | 0                         | 0.00                         |
| 18      | 0                      | 0                         | 0                          | 0                     | 0.00                     | 0                          | 0                             | 0                              | 0                         | 0.00                         |
| 19      | 0                      | 0                         | 0                          | 0                     | 0.00                     | 0                          | 0                             | 0                              | 0                         | 0.00                         |
| 20      | 0                      | 0                         | 0                          | 0                     | 0.00                     | 0                          | 0                             | 0                              | 0                         | 0.00                         |
| 21      | 0                      | 0                         | 0                          | 0                     | 0.00                     | 0                          | 0                             | 0                              | 0                         | 0.00                         |
| 22      | 0                      | 0                         | 0                          | 0                     | 0.00                     | 0                          | 0                             | 0                              | 0                         | 0.00                         |
| 23      | 0                      | 0                         | 0                          | 0                     | 0.00                     | 0                          | 0                             | 0                              | 0                         | 0.00                         |
| 24      | 0                      | 0                         | 0                          | 0                     | 0.00                     | 0                          | 0                             | 0                              | 0                         | 0.00                         |

Table S2 continued.

| Lake ID | <i>C. pubera</i> | <i>Cypridopsis sp.</i> |
|---------|------------------|------------------|------------------|------------------|------------------|------------------------|------------------------|------------------------|------------------------|------------------------|
|         | valves           | carapaces        | soft parts       | total            | per gram         | valves                 | carapaces              | soft parts             | total                  | per gram               |
| 1       | 0                | 0                | 0                | 0                | 0.00             | 0                      | 0                      | 0                      | 0                      | 0.00                   |
| 2       | 0                | 0                | 0                | 0                | 0.00             | 1                      | 0                      | 0                      | 1                      | 0.22                   |
| 3       | 68               | 7                | 5                | 75               | 75.00            | 0                      | 0                      | 0                      | 0                      | 0.00                   |
| 4       | 0                | 0                | 0                | 0                | 0.00             | 0                      | 0                      | 0                      | 0                      | 0.00                   |
| 5       | 0                | 0                | 0                | 0                | 0.00             | 0                      | 0                      | 0                      | 0                      | 0.00                   |
| 6       | 3                | 0                | 0                | 3                | 0.98             | 0                      | 0                      | 0                      | 0                      | 0.00                   |
| 7       | 0                | 0                | 0                | 0                | 0.00             | 0                      | 0                      | 0                      | 0                      | 0.00                   |
| 8       | 1                | 0                | 0                | 1                | 0.74             | 0                      | 0                      | 0                      | 0                      | 0.00                   |
| 9       | 0                | 0                | 0                | 0                | 0.00             | 0                      | 0                      | 0                      | 0                      | 0.00                   |
| 10      | 68               | 6                | 3                | 74               | 38.12            | 0                      | 0                      | 0                      | 0                      | 0.00                   |
| 11      | 0                | 0                | 0                | 0                | 0.00             | 1                      | 0                      | 1                      | 1                      | 0.89                   |
| 12      | 3                | 7                | 5                | 10               | 1.46             | 0                      | 0                      | 0                      | 0                      | 0.00                   |
| 13      | 0                | 0                | 0                | 0                | 0.00             | 0                      | 0                      | 0                      | 0                      | 0.00                   |
| 14      | 0                | 0                | 0                | 0                | 0.00             | 0                      | 0                      | 0                      | 0                      | 0.00                   |
| 15      | 0                | 0                | 0                | 0                | 0.00             | 0                      | 0                      | 0                      | 0                      | 0.00                   |
| 16      | 0                | 0                | 0                | 0                | 0.00             | 0                      | 0                      | 0                      | 0                      | 0.00                   |
| 17      | 48               | 3                | 1                | 51               | 87.03            | 0                      | 0                      | 0                      | 0                      | 0.00                   |
| 18      | 6                | 0                | 0                | 6                | 0.22             | 0                      | 0                      | 0                      | 0                      | 0.00                   |
| 19      | 67               | 2                | 2                | 69               | 67.39            | 0                      | 0                      | 0                      | 0                      | 0.00                   |
| 20      | 0                | 0                | 0                | 0                | 0.00             | 0                      | 0                      | 0                      | 0                      | 0.00                   |
| 21      | 0                | 0                | 0                | 0                | 0.00             | 0                      | 0                      | 0                      | 0                      | 0.00                   |
| 22      | 0                | 0                | 0                | 0                | 0.00             | 0                      | 0                      | 0                      | 0                      | 0.00                   |
| 23      | 49               | 21               | 10               | 70               | 29.19            | 0                      | 0                      | 0                      | 0                      | 0.00                   |
| 24      | 0                | 0                | 0                | 0                | 0.00             | 0                      | 0                      | 0                      | 0                      | 0.00                   |

**Table S2 continued.**

| <b>Lake ID</b> | <b><i>S. aculeata</i><br/>valves</b> | <b><i>S. aculeata</i><br/>carapaces</b> | <b><i>S. aculeata</i><br/>soft parts</b> | <b><i>S. aculeata</i><br/>total</b> | <b><i>S. aculeata</i><br/>per gram</b> |
|----------------|--------------------------------------|-----------------------------------------|------------------------------------------|-------------------------------------|----------------------------------------|
| 1              | 0                                    | 0                                       | 0                                        | 0                                   | 0.00                                   |
| 2              | 0                                    | 0                                       | 0                                        | 0                                   | 0.00                                   |
| 3              | 0                                    | 0                                       | 0                                        | 0                                   | 0.00                                   |
| 4              | 0                                    | 0                                       | 0                                        | 0                                   | 0.00                                   |
| 5              | 0                                    | 0                                       | 0                                        | 0                                   | 0.00                                   |
| 6              | 0                                    | 0                                       | 0                                        | 0                                   | 0.00                                   |
| 7              | 0                                    | 0                                       | 0                                        | 0                                   | 0.00                                   |
| 8              | 0                                    | 0                                       | 0                                        | 0                                   | 0.00                                   |
| 9              | 0                                    | 0                                       | 0                                        | 0                                   | 0.00                                   |
| 10             | 0                                    | 0                                       | 0                                        | 0                                   | 0.00                                   |
| 11             | 1                                    | 1                                       | 0                                        | 2                                   | 1.78                                   |
| 12             | 0                                    | 0                                       | 0                                        | 0                                   | 0.00                                   |
| 13             | 0                                    | 0                                       | 0                                        | 0                                   | 0.00                                   |
| 14             | 0                                    | 0                                       | 0                                        | 0                                   | 0.00                                   |
| 15             | 0                                    | 0                                       | 0                                        | 0                                   | 0.00                                   |
| 16             | 0                                    | 0                                       | 0                                        | 0                                   | 0.00                                   |
| 17             | 0                                    | 0                                       | 0                                        | 0                                   | 0.00                                   |
| 18             | 1                                    | 11                                      | 4                                        | 12                                  | 0.45                                   |
| 19             | 0                                    | 0                                       | 0                                        | 0                                   | 0.00                                   |
| 20             | 0                                    | 0                                       | 0                                        | 0                                   | 0.00                                   |
| 21             | 0                                    | 0                                       | 0                                        | 0                                   | 0.00                                   |
| 22             | 0                                    | 0                                       | 0                                        | 0                                   | 0.00                                   |
| 23             | 0                                    | 0                                       | 0                                        | 0                                   | 0.00                                   |
| 24             | 0                                    | 0                                       | 0                                        | 0                                   | 0.00                                   |

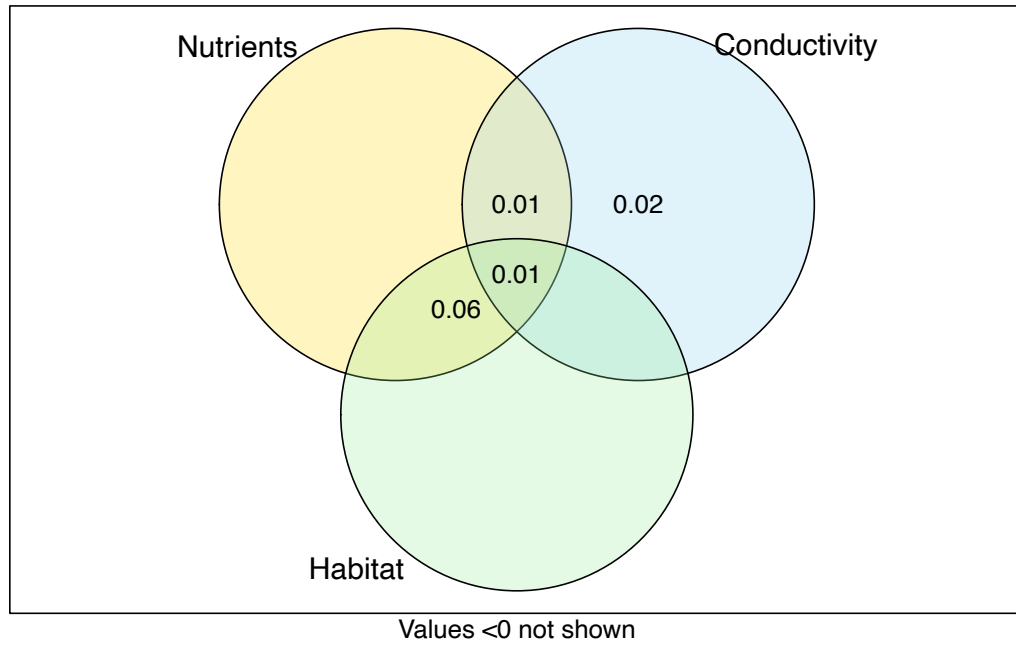

**Figure S2.** Variance partitioning analysis of ostracod species and selected environmental variables for the 24 study lakes
